# Supplementary material for: The Mycobacterium tuberculosis regulatory network and hypoxia
Source: Springer Nature journal article supplement (doi:10.1038/nature12337), 2013-07-01
Supplement: 41586_2013_BFnature12337_MOESM345_ESM.pdf [file 41586_2013_BFnature12337_MOESM345_ESM.pdf]

**Details of ChIP Mapping for Each Mapped TF.** The second column identifies the number of up (red) and downregulated (blue) targets from the overexpression data (NE indicates no expression data was available). The third column shows the count and distribution of predicted binding site locations by genomic region with yellow bars indicating intergenic peaks and blue bars indicating genic peaks. Only binding site locations greater than 1% the maximum impulse height were included in this analysis. The fourth column contains the motif identified from the entire set of peaks for each transcription factor. The number above the motif represents the negative log of the E-value for the motif.

| Transcription Factor | Up/down regulation interactions                                                     | Binding Locations intergenic(yellow)/genic(blue)                                                | Predicted Motif and – Log <sub>10</sub> (E-Value)                                            |
|----------------------|-------------------------------------------------------------------------------------|-------------------------------------------------------------------------------------------------|----------------------------------------------------------------------------------------------|
| Rv0038               |    | 1/1<br>       | -2<br>    |
| Rv0043c              |    | 7/38<br>     | 41<br>   |
| Rv0081               |  | 256/510<br> | 218<br> |
| Rv0232               |  | 9/16<br>    | 17<br>  |

|                       |                                                                                     |                                                                                                   |                                                                                                  |
|-----------------------|-------------------------------------------------------------------------------------|---------------------------------------------------------------------------------------------------|--------------------------------------------------------------------------------------------------|
| <p><b>Rv0324</b></p>  |    | <p>58/229</p>   | <p>90</p>     |
| <p><b>Rv0465c</b></p> | <p>NE</p>                                                                           | <p>42/75</p>     | <p>149</p>    |
| <p><b>Rv0474</b></p>  | <p>NE</p>                                                                           | <p>23/8</p>    | <p>21</p>    |
| <p><b>Rv0494</b></p>  |  | <p>8/52</p>   | <p>90</p>   |
| <p><b>Rv0602c</b></p> |  | <p>39/69</p>  | <p>137</p>  |

|                       |                                                                                    |                                                                                                    |                                                                                                  |
|-----------------------|------------------------------------------------------------------------------------|----------------------------------------------------------------------------------------------------|--------------------------------------------------------------------------------------------------|
| <p><b>Rv0653c</b></p> |   | <p>2/12</p>      | <p>24</p>     |
| <p><b>Rv0681</b></p>  |   | <p>6/3</p>       | <p>2</p>      |
| <p><b>Rv0757</b></p>  |  | <p>24/48</p>    | <p>122</p>   |
| <p><b>Rv0767c</b></p> | <p>NE</p>                                                                          | <p>70/508</p>  | <p>547</p>  |
| <p><b>Rv0821c</b></p> | <p>NE</p>                                                                          | <p>2/0</p>     | <p>-2</p>   |

|                       |                                                                                     |                                                                                                  |                                                                                                |
|-----------------------|-------------------------------------------------------------------------------------|--------------------------------------------------------------------------------------------------|------------------------------------------------------------------------------------------------|
| <p><b>Rv1049</b></p>  | <p>NE</p>                                                                           | <p>28/131</p> 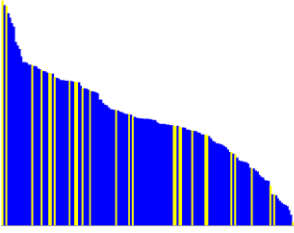 | <p>63</p>   |
| <p><b>Rv1152</b></p>  |    | <p>1/5</p>     | <p>13</p>   |
| <p><b>Rv1167c</b></p> | <p>NE</p>                                                                           | <p>4/6</p>    | <p>16</p>  |
| <p><b>Rv1176c</b></p> | <p>NE</p>                                                                           | <p>2/1</p>   | <p>0</p>  |
| <p><b>Rv1255c</b></p> |  | <p>7/10</p>  | <p>2</p>  |

|                       |                                                                                     |                                                                                                   |                                                                                                 |
|-----------------------|-------------------------------------------------------------------------------------|---------------------------------------------------------------------------------------------------|-------------------------------------------------------------------------------------------------|
| <p><b>Rv1395</b></p>  | <p>NE</p>                                                                           | <p>8/28</p> 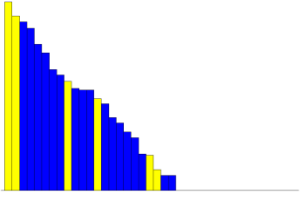    | <p>30</p>    |
| <p><b>Rv1657</b></p>  | <p>NE</p>                                                                           | <p>0/1</p>      | <p>NA</p>                                                                                       |
| <p><b>Rv1773c</b></p> | <p>NE</p>                                                                           | <p>16/23</p>   | <p>23</p>   |
| <p><b>Rv1909c</b></p> |  | <p>6/7</p>    | <p>8</p>   |
| <p><b>Rv1956</b></p>  |  | <p>12/58</p>  | <p>63</p>  |

|         |                                                                                     |                                                                                                |                                                                                              |
|---------|-------------------------------------------------------------------------------------|------------------------------------------------------------------------------------------------|----------------------------------------------------------------------------------------------|
| Rv1985c |    | 20/23<br>    | 17<br>    |
| Rv1990c | NE                                                                                  | 80/574<br>   | 370<br>   |
| Rv2021c |   | 48/376<br>  | 331<br>  |
| Rv2034  |  | 48/143<br> | 189<br> |
| Rv2324  |  | 33/205<br> | 224<br> |



|                       |                                                                                     |                                                                                                   |                                                                                                  |
|-----------------------|-------------------------------------------------------------------------------------|---------------------------------------------------------------------------------------------------|--------------------------------------------------------------------------------------------------|
| <p><b>Rv2989</b></p>  |    | <p>25/97</p>    | <p>138</p>    |
| <p><b>Rv3060c</b></p> | <p>NE</p>                                                                           | <p>1/0</p>      | <p>NA</p>                                                                                        |
| <p><b>Rv3066</b></p>  |   | <p>2/2</p>     | <p>7</p>     |
| <p><b>Rv3124</b></p>  |  | <p>4/61</p>   | <p>163</p>  |
| <p><b>Rv3133c</b></p> |  | <p>61/67</p>  | <p>165</p>  |



|                       |                                                                                     |                                                                                                   |                                                                                                  |
|-----------------------|-------------------------------------------------------------------------------------|---------------------------------------------------------------------------------------------------|--------------------------------------------------------------------------------------------------|
| <p><b>Rv3183</b></p>  |    | <p>2/5</p>      | <p>2</p>      |
| <p><b>Rv3219</b></p>  |    | <p>20/12</p>    | <p>0</p>      |
| <p><b>Rv3246c</b></p> |    | <p>50/18</p>   | <p>122</p>   |
| <p><b>Rv3249c</b></p> |  | <p>25/93</p>  | <p>274</p>  |
| <p><b>Rv3291c</b></p> |  | <p>7/6</p>    | <p>8</p>    |

|                |                                                                                     |                                                                                                     |                                                                                                  |
|----------------|-------------------------------------------------------------------------------------|-----------------------------------------------------------------------------------------------------|--------------------------------------------------------------------------------------------------|
| <p>Rv3334</p>  |    | <p>4/1</p>        | <p>2</p>      |
| <p>Rv3405c</p> |    | <p>1/0</p>        | <p>NA</p>                                                                                        |
| <p>Rv3574</p>  |    | <p>40/295</p>    | <p>670</p>   |
| <p>Rv3583c</p> |  | <p>3/4</p>      | <p>5</p>    |
| <p>Rv3597c</p> |  | <p>180/281</p>  | <p>345</p>  |

|                |                                                                                   |                                                                                                |                                                                                               |
|----------------|-----------------------------------------------------------------------------------|------------------------------------------------------------------------------------------------|-----------------------------------------------------------------------------------------------|
| <b>Rv3855</b>  |  | <p>3/17</p>  | <p>23</p>  |
| <b>Rv3862c</b> |  | <p>3/7</p>   | <p>6</p>   |
